# Supplementary material for: A simplified molecularly imprinted ECL sensor based on Mn2SnO4 nanocubes for sensitive detection of ribavirin
Source: Royal Society of Chemistry journal article supplement (doi:10.1039/d3an02077k), 2024-01-01
Supplement: d3an02077k1.pdf [file d3an02077k1.pdf]

## Supporting Information

### **A simplified molecularly imprinted ECL sensor based on Mn<sub>2</sub>SnO<sub>4</sub> nanocubes for sensitive detection of ribavirin**

Kaida Kuang<sup>#</sup>, Ya Li<sup>#</sup>, Yang Chen\*, Yu Ji, Nengqin Jia\*

The Education Ministry Key Lab of Resource Chemistry, Joint International Research Laboratory of Resource Chemistry, Ministry of Education, Shanghai Frontiers Science Center of Biomimetic Catalysis, Shanghai Key Laboratory of Rare Earth Functional Materials, College of Chemistry and Materials Science, Shanghai Normal University, Shanghai 200234, China

<sup>#</sup>Equal contribution to this work.

\*Corresponding authors. E-mail: [nqjia@shnu.edu.cn](mailto:nqjia@shnu.edu.cn) (N. Jia), [yangchen@shnu.edu.cn](mailto:yangchen@shnu.edu.cn) (Y. Chen)

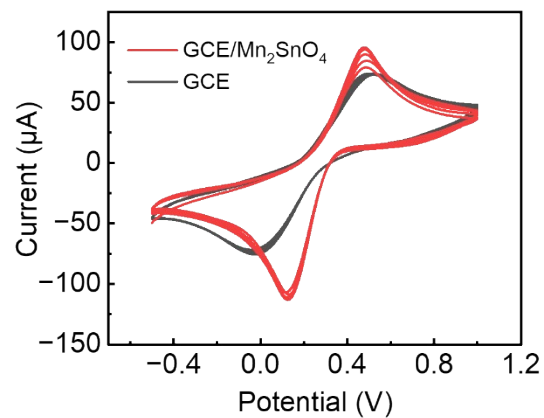

**Figure S1** Cyclic voltammograms of GCE (black line) and Mn<sub>2</sub>SnO<sub>4</sub>/GCE (red line) performed in 5 mM Fe(CN)<sub>6</sub><sup>3-/4-</sup> and 0.1 M KCl solution at a scan rate of 0.1 V s<sup>-1</sup>

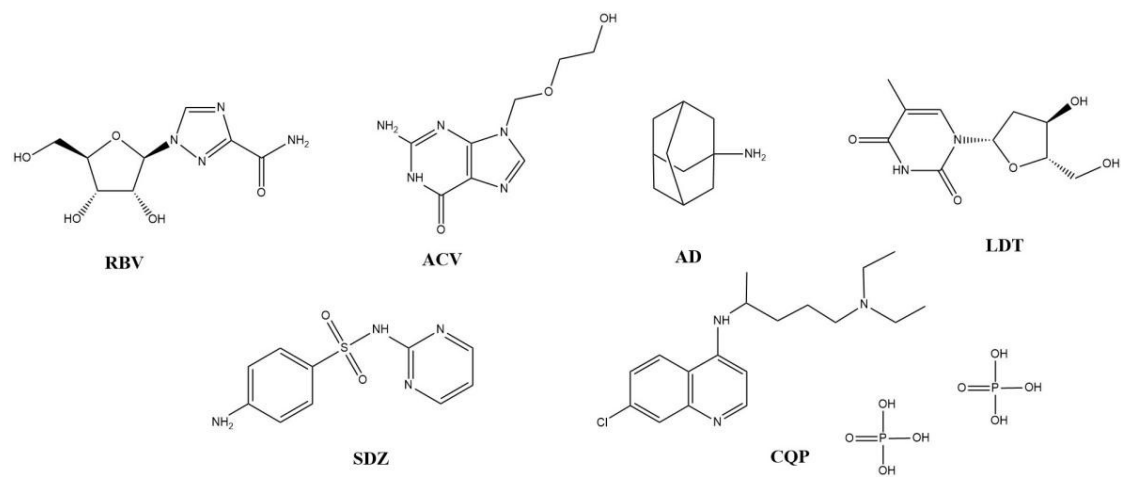

**Figure S2** Structural formula of interfering substance.

**Table S1** Comparison of the RBV detection techniques.

| Methods  | Linear Range (ng mL <sup>-1</sup> ) | Detection Limit                           | Ref.      |
|----------|-------------------------------------|-------------------------------------------|-----------|
| QCM      | 1–750                               | $2.64 \times 10^{-3} \mu\text{g mL}^{-1}$ | 1         |
| LC-MS/MS | 5–1000                              | $5 \times 10^{-3} \mu\text{g mL}^{-1}$    | 2         |
| HPLC     | 200–5000                            | $81 \mu\text{g kg}^{-1}$                  | 3         |
| icELISA  | 1.17–33.36                          | $4.23 \mu\text{g kg}^{-1}$                | 4         |
| ECL      | 1–2000                              | $8.5 \times 10^{-4} \mu\text{g mL}^{-1}$  | This work |

## References

1. C. Liu, M. Qie, X. Hu, H. Wang, G. Fang and S. Wang, *Anal. Methods*, 2022, **14**, 2497-2503.
2. J.-K. Ma, X.-C. Huang and S.-L. Wei, *J. Sep. Sci.*, 2019, **42**, 3372-3381.
3. X. Shi, D. Zhu, J. Lou, B. Zhu, A.-r. Hu and D. Gan, *J. Chromatogr. B*, 2015, **1002**, 353-357.
4. J. Zhu, Q. Li, X. Yu, X. Zhang, H. Li, K. Wen, Y. Ke, S. Zhang and Z. Wang, *J. Food Sci.*, 2021, **86**, 2851-2860.
